# Supplementary material
Source: MDPI journal article supplement (https://www.mdpi.com/2076-3263/10/5/183)
Supplement: s1 [file s1]

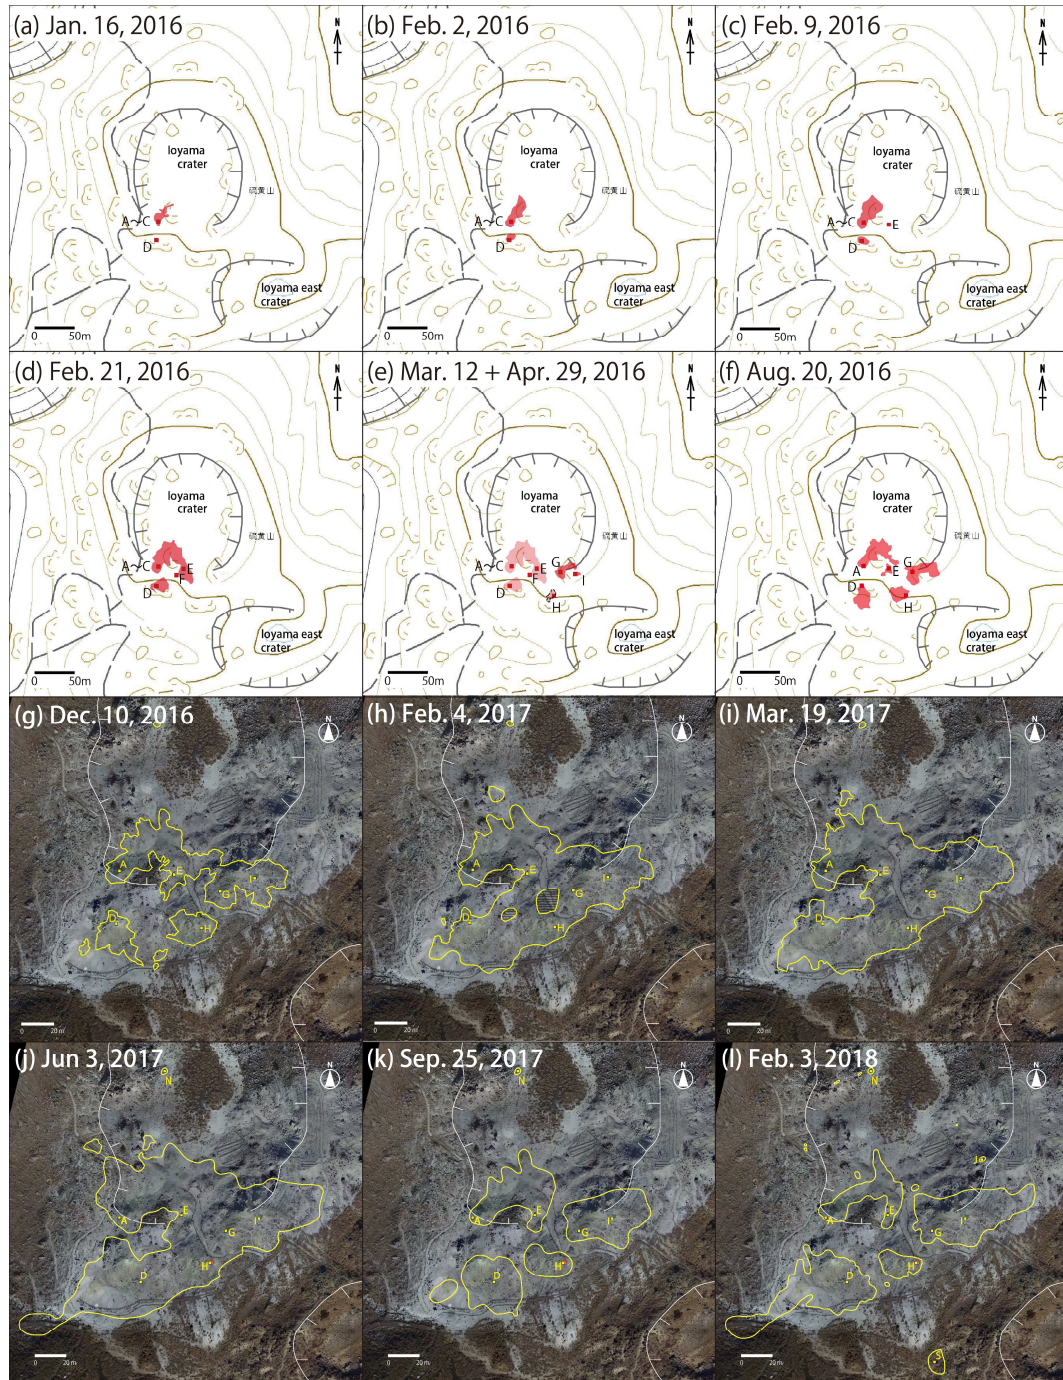

**Figure S1.** The distribution of geothermal anomaly area over 50 °C in Ioyama fumarole area: (1) January 16, 2016; (b) February 2, 2016; (c) February 9, 2016; (d) February 21, 2016; (e) March 12 and April 29, 2016. Light red shows the same area in d. The spot H appeared on March 12. The spots G and I appeared on April 29; (f) August 20, 2016; (g) December 10, 2016; (h) February 4, 2017. Areas horizontal lines are below 50 °C; (i) March 19, 2017; (j) June 3, 2017; (k) September 25, 2017; (l) February 3, 2018. The base maps in (a) to (f) by GSI (Geospatial Information Authority of Japan) map (<https://maps.gsi.go.jp/>).



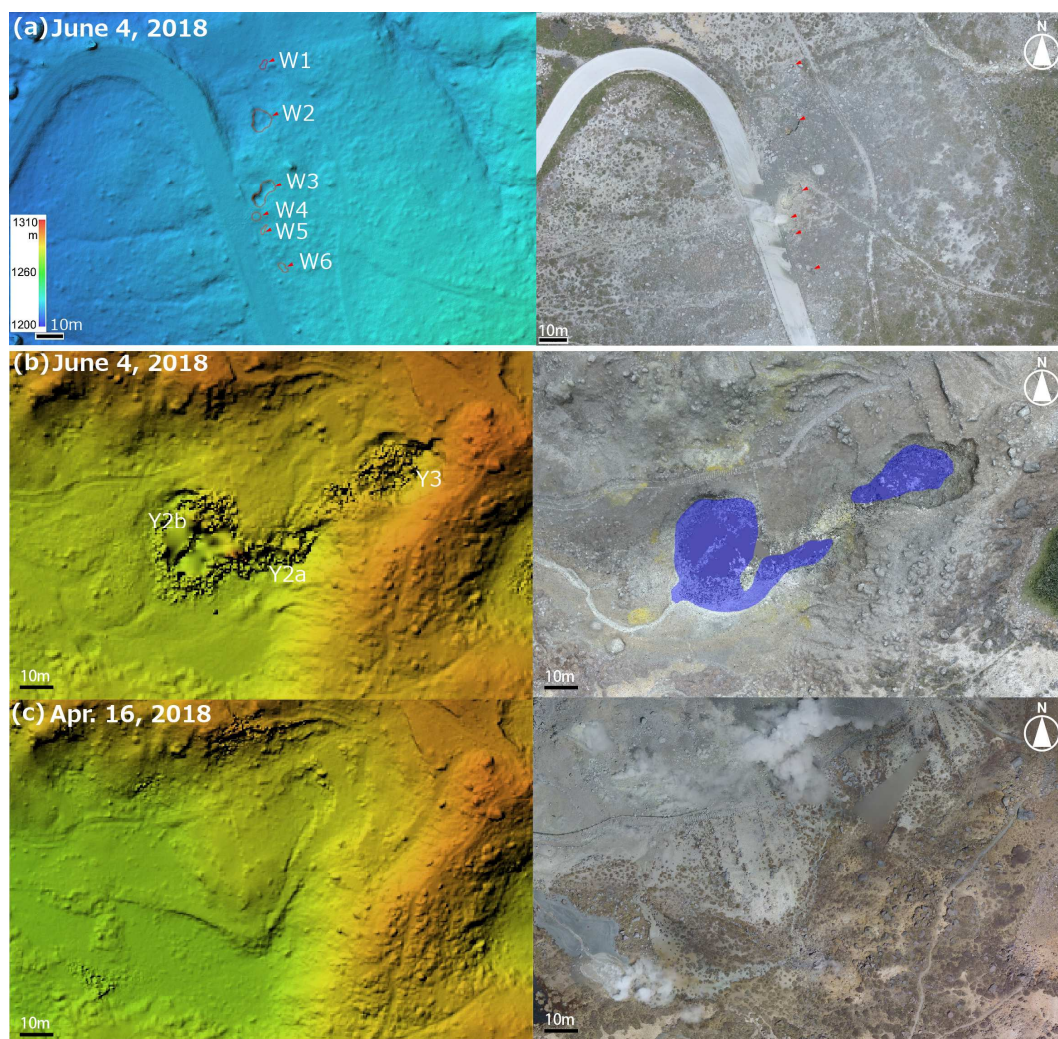

**Figure S2.** Digital elevation models and photographs: (a) Around the Ioyama-west crater on June 4, 2018; (b) Around the Ioyama-south craters on June 4, 2018; (c) Around the Ioyama-south craters on April 16, 2018.

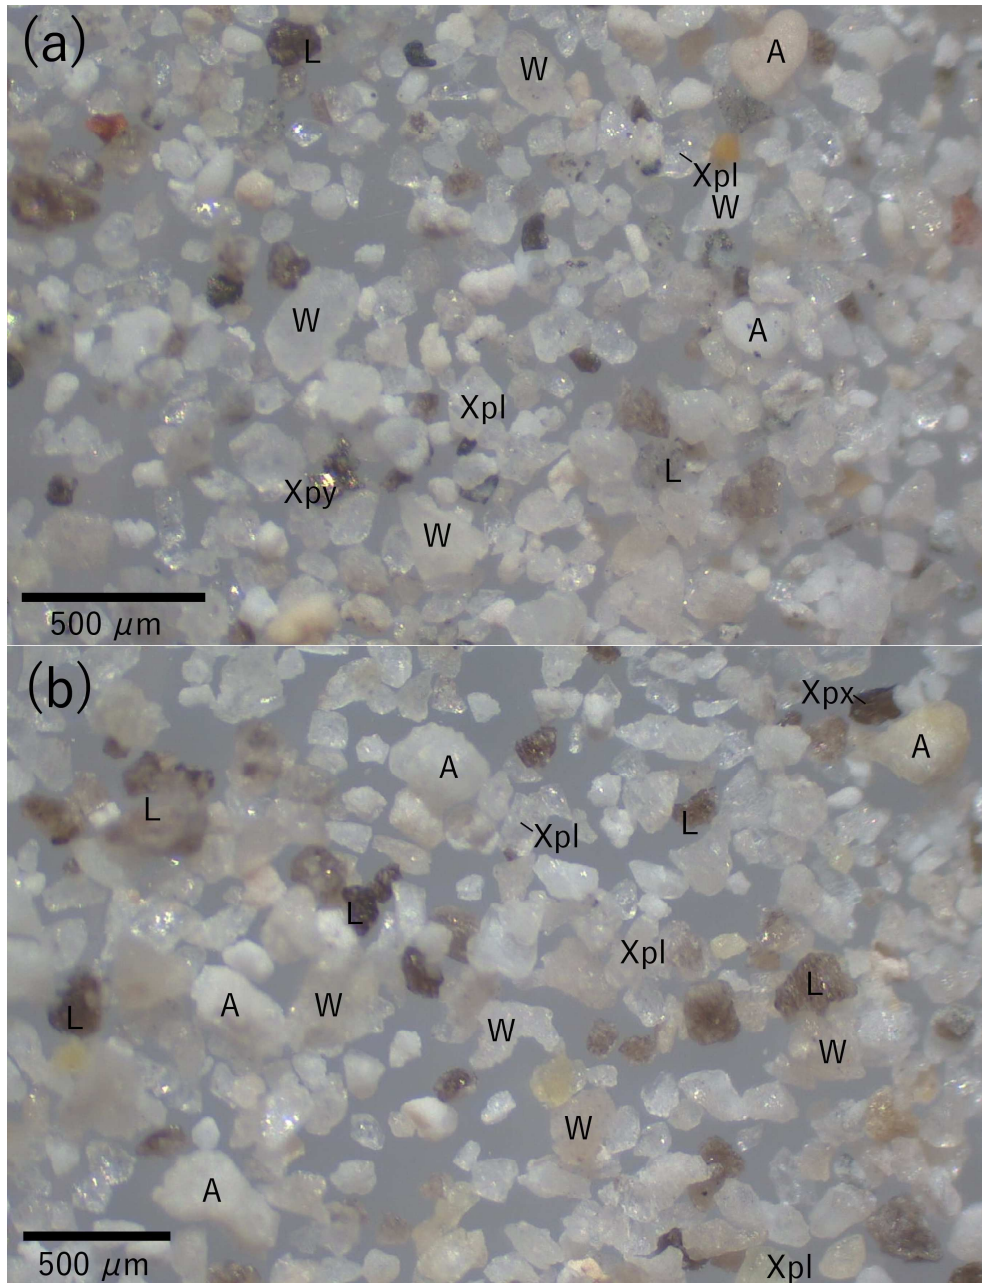

**Figure S3.** Photomicrographs of ashy deposit grains: (a) 20180419-ash sample collected from the Ioyama-south craters. ; (b) 20170426-ash sample collected from the jet fumarole vent A. L: lithic fragment, W: white-colored fragment, A: strongly altered fragment, Xpl: plagioclase, Xpy: pyrite, Xpx: pyroxenes.

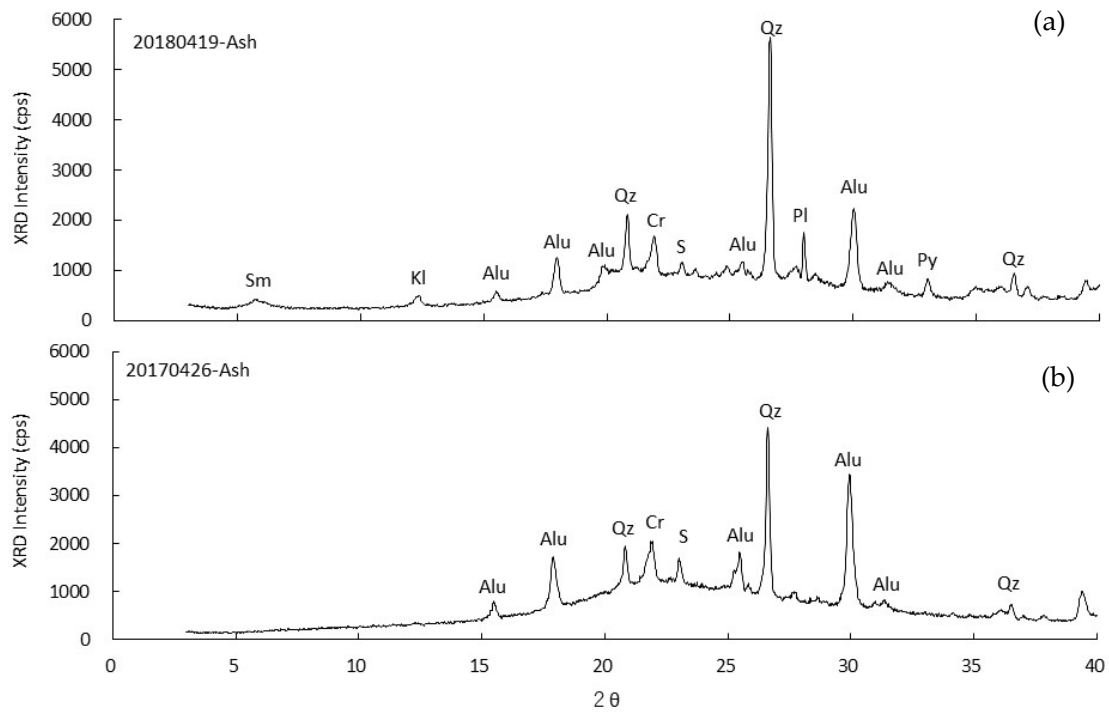

**Figure S4.** XRD analyses: (a) 20180419-ash sample collected from the Ioyama-south craters. ; (b) 20170426-ash sample collected from jet fumarole vent A. Alu: alunite (soda), Kl: kaolinite, Cr: cristobalite, Qz: quartz, Py: pyrite-, Sm: smectite, S: sulfur, Pl: plagioclase.

**Table S1.** The oxygen and hydrogen isotope analyses of hydrothermal water from the Ioyama.

| <b>Sample No.</b> | <b>Day</b>    | <b>pH</b> | <b><math>\delta\text{D}</math> (‰)</b> | <b><math>\delta^{18}\text{O}</math> (‰)</b> |
|-------------------|---------------|-----------|----------------------------------------|---------------------------------------------|
| K3-1              | Feb. 16, 2016 | 2.1       | -53.1                                  | -8.3                                        |
| K3-2              | Feb. 21, 2016 | 1.9       | -53.1                                  | -8.1                                        |
| K3-3              | Mar. 12, 2016 | 2.0       | -53.9                                  | -8.2                                        |
| K3-4              | Mar. 30, 2016 | 2.0       | -54.0                                  | -8.0                                        |
| Y1                | Apr. 16, 2018 | 1.6       | -31.3                                  | 0.0                                         |
